# Supplementary material for: UVB Induces a Genome-Wide Acting Negative Regulatory Mechanism That Operates at the Level of Transcription Initiation in Human Cells
Source: PubMed Central journal article supplement (PMC4109906; doi:10.1371/journal.pgen.1004483), 2014-07-24
Supplement: pgen.1004483.s002.pdf [file pgen.1004483.s002.pdf]

Mean Pol II tag number ■ on the gene body of the top 4500 expressed genes in each time points after UVB treatment

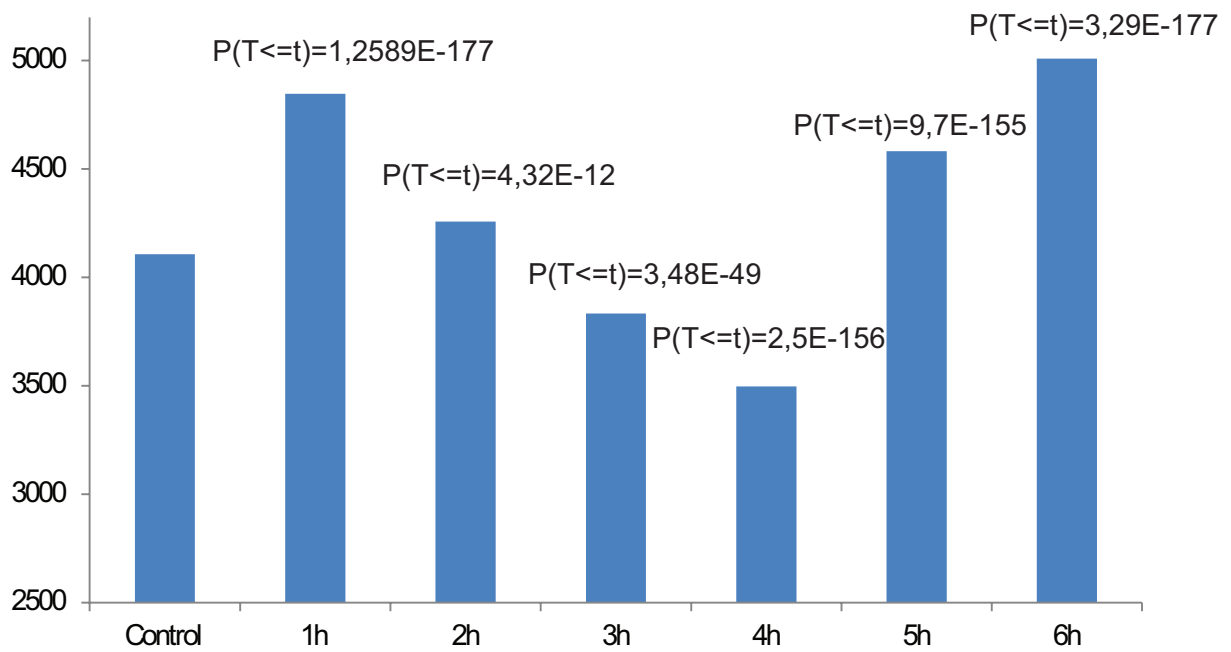

Figure S2
