# Supplementary material for: UVB Induces a Genome-Wide Acting Negative Regulatory Mechanism That Operates at the Level of Transcription Initiation in Human Cells
Source: PubMed Central journal article supplement (PMC4109906; doi:10.1371/journal.pgen.1004483), 2014-07-24
Supplement: pgen.1004483.s004.pdf [file pgen.1004483.s004.pdf]

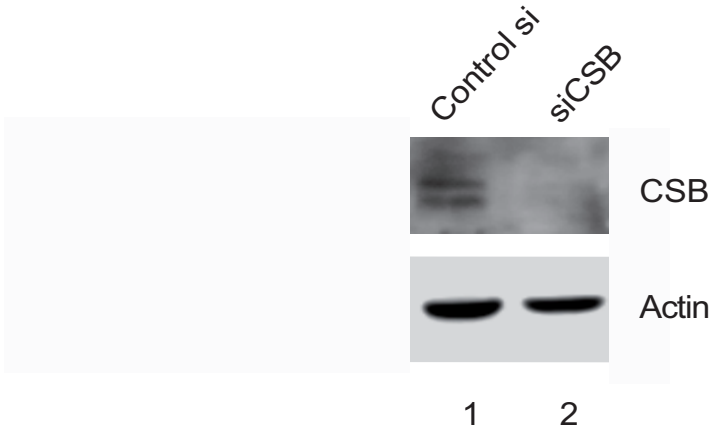

Figure S4:
