# Supplementary material for: UVB Induces a Genome-Wide Acting Negative Regulatory Mechanism That Operates at the Level of Transcription Initiation in Human Cells
Source: PubMed Central journal article supplement (PMC4109906; doi:10.1371/journal.pgen.1004483), 2014-07-24
Supplement: pgen.1004483.s005.pdf [file pgen.1004483.s005.pdf]

## MANTEIA

| Group     | GO term                                                     | p-value  |
|-----------|-------------------------------------------------------------|----------|
| <b>Aa</b> | cellular protein metabolic process                          | 1,53E-09 |
|           | mRNA metabolic process                                      | 6,81E-08 |
|           | cellular component organization at cellular level           | 6,88E-08 |
| <b>Ab</b> | negative regulation of macromolecule metabolic process      | 8,90E-14 |
|           | negative regulation of transcription, DNA-dependent         | 5,34E-10 |
|           | regulation of transcription from RNA polymerase II promoter | 3,22E-08 |
| <b>Ac</b> | cellular macromolecular complex subunit organization        | 1,07E-28 |
|           | translational elongation                                    | 8,58E-28 |
|           | translational termination                                   | 5,90E-26 |
| <b>Ad</b> | mRNA metabolic process                                      | 2,17E-17 |
|           | cellular macromolecule metabolic process                    | 1,08E-11 |
|           | primary metabolic process                                   | 4,05E-10 |
| <b>Ae</b> | cellular metabolic process                                  | 3,15E-18 |
|           | translation                                                 | 1,64E-14 |
|           | primary metabolic process                                   | 9,42E-14 |
| <b>Af</b> | translation                                                 | 9,46E-21 |
|           | signal transduction                                         | 4,87E-11 |
|           | mRNA metabolic process                                      | 3,01E-18 |
| <b>Ag</b> | energy derivation by oxidation of organic compounds         | 9,97E-08 |
|           | response to UV                                              | 1,36E-05 |
|           | negative regulation of macromolecule metabolic process      | 7,16E-06 |
| <b>B</b>  | regulation of cellular metabolic process                    | 5,25E-07 |
|           | apoptotic process                                           | 3,93E-05 |
|           | RNA metabolic process                                       | 1,92E-05 |

Table S1
